# Supplementary material for: Second-Generation Antipsychotics’ Effectiveness and Tolerability: A Review of Real-World Studies in Patients with Schizophrenia and Related Disorders
Source: MDPI journal article supplement (doi:10.3390/jcm11154530), 2022-08-03
Supplement: s1 [file s1]

|                                  |                                       |          |          |          |          |          |          |          |                 |
|----------------------------------|---------------------------------------|----------|----------|----------|----------|----------|----------|----------|-----------------|
| <i>Patel et al. (2019)</i>       | Retrospective claims-based study      | Moderate | Low      | Moderate | Low      | Low      | Moderate | Low      | <b>Moderate</b> |
| <i>Pilon et al (2017)</i>        | Cohort study                          | High     | Low      | Low      | Moderate | Moderate | Moderate | Moderate | <b>High</b>     |
| <i>Rajagopalan et al. (2017)</i> | Database                              | Low      | Low      | Moderate | Low      | Low      | Moderate | Low      | <b>Moderate</b> |
| <i>Ratner et al. (2007)</i>      | Observational trial                   | Moderate | Moderate | Low      | Low      | Low      | Low      | Low      | <b>Moderate</b> |
| <i>Ritsner et al (2007)</i>      | Observational trial                   | Moderate | Moderate | Low      | Low      | Low      | Low      | Low      | <b>Moderate</b> |
| <i>Rosso et al. (2016)</i>       | Observational study                   | Low      | Moderate | Low      | Moderate | Moderate | Moderate | Low      | <b>Moderate</b> |
| <i>Schöttle et al. (2018)</i>    | Non interventional study              | Low      | Moderate | Moderate | Low      | Moderate | High     | Moderate | <b>High</b>     |
| <i>Schreiner et al. (2014)</i>   | Interventional unblinded study        | Moderate | Low      | Moderate | Low      | Moderate | Moderate | Low      | <b>Moderate</b> |
| <i>Stam et al. (2020)</i>        | Database                              | Moderate | Low      | Low      | Moderate | Low      | Moderate | Moderate | <b>Moderate</b> |
| <i>Takács et al. (2019)</i>      | Longitudinal study                    | Moderate | Moderate | Moderate | Low      | Low      | Moderate | Moderate | <b>Moderate</b> |
| <i>Taylor et al. (2005)</i>      | Prospective comparative outcome study | Moderate | Moderate | Moderate | Low      | Moderate | Moderate | Moderate | <b>Moderate</b> |
| <i>Tiihonen et al. (2017)</i>    | Cohort study                          | Moderate | Moderate | Low      | Moderate | Low      | Moderate | Moderate | <b>Moderate</b> |
| <i>Vanasse et al. (2016)</i>     | Cohort study                          | Moderate | Low      | Moderate | Low      | Low      | Moderate | Low      | <b>Moderate</b> |
| <i>Yan et al. (2020)</i>         | Cohort study                          | High     | Moderate | High     | Low      | Low      | Moderate | Low      | <b>High</b>     |
| <i>Zhang et al. (2019)</i>       | Real-world clinical study             | Low      | Moderate | Low      | Moderate | Low      | Moderate | Low      | <b>Moderate</b> |
