# Supplementary figures and images for: Second-Generation Antipsychotics’ Effectiveness and Tolerability: A Review of Real-World Studies in Patients with Schizophrenia and Related Disorders
Source: MDPI journal article supplement (doi:10.3390/jcm11154530), 2022-08-03

**Supplementary Figure S1.** Flow diagram showing study selection process of included articles.

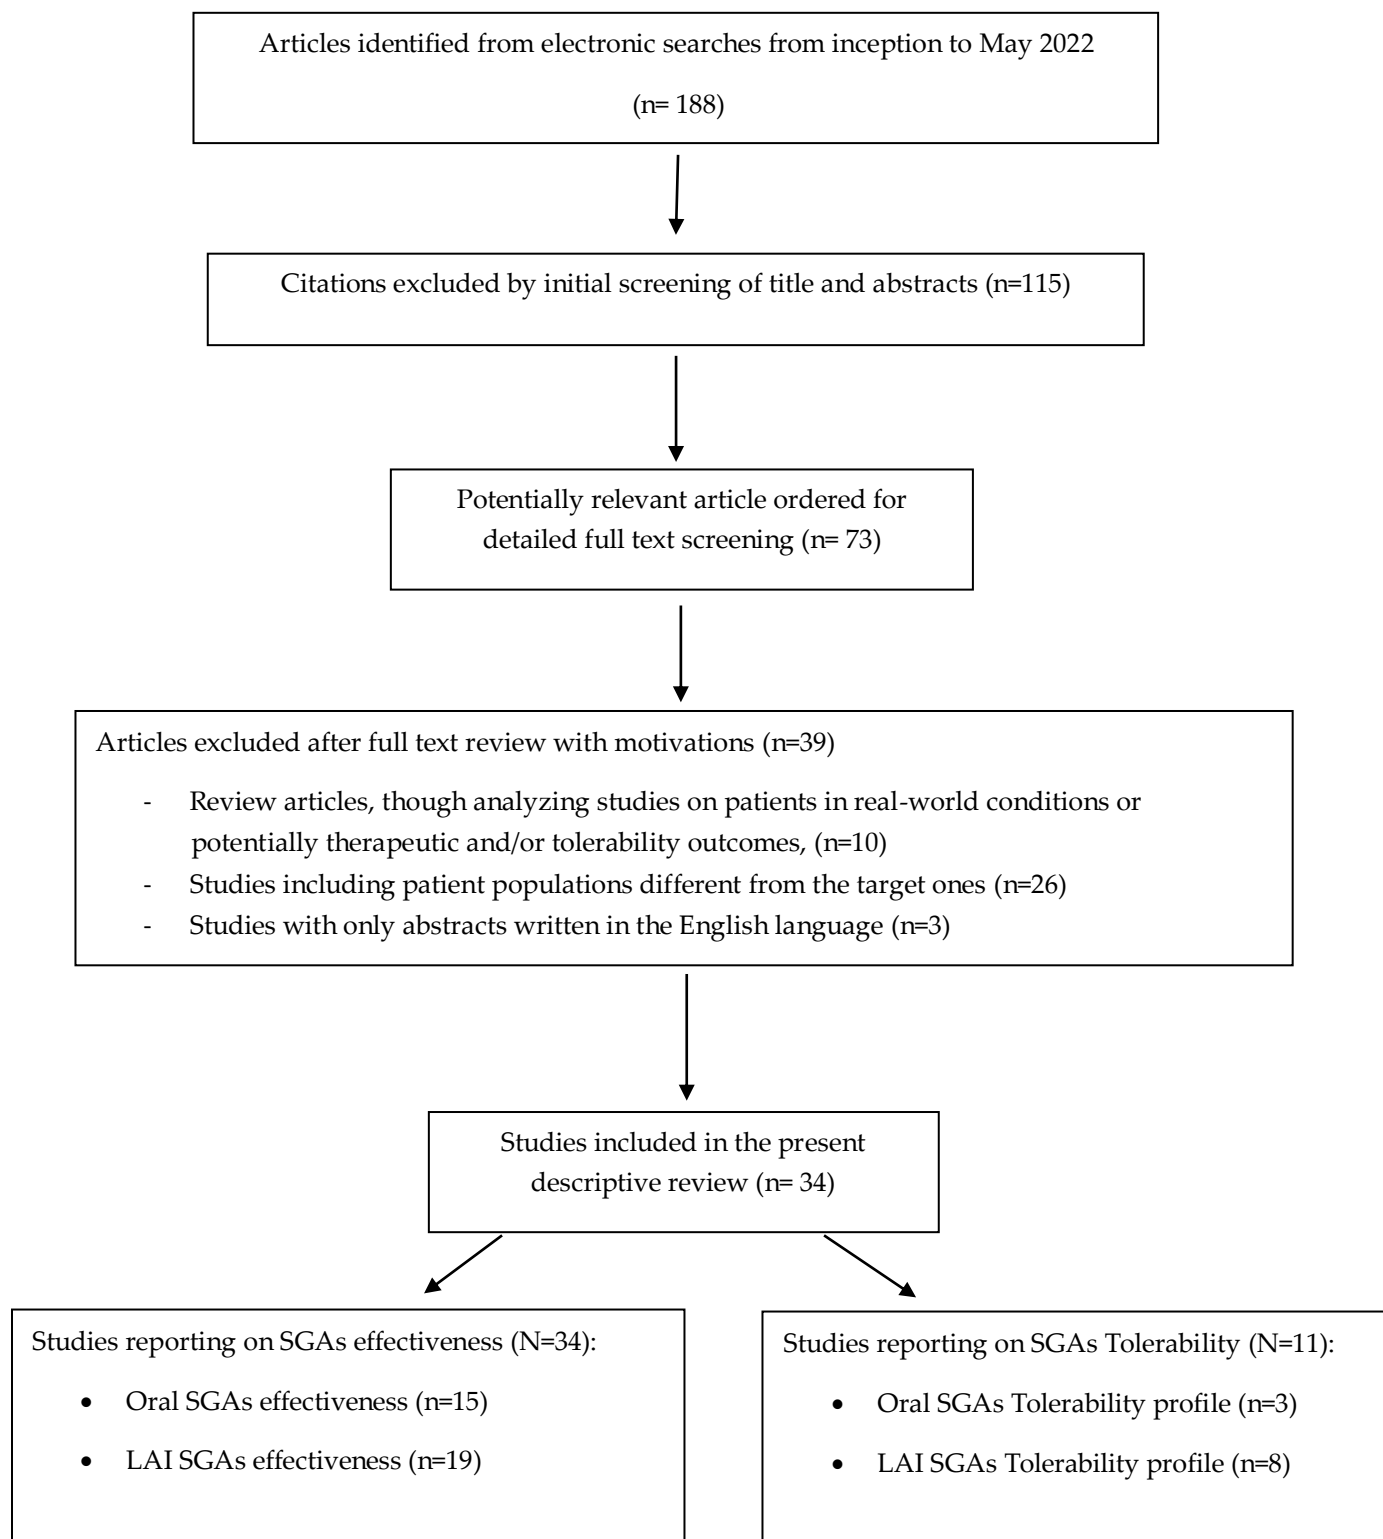

Supplement: s1 [file s1]
